# Supplementary material
Source: PubMed Central journal article supplement (PMC8522746)
Supplement: aac.01332-21-s0001.pdf [file aac.01332-21-s0001.pdf]

## Supplementary Materials

**Supplementary Table 1.** Agar dilution susceptibility testing results for 150 *Bcc* and *B. gladioli* strains.

| Strains                                                    | Imipenem | Imipenem-relebactam* | Ceftazidime | Ceftazidime-avibactam* |
|------------------------------------------------------------|----------|----------------------|-------------|------------------------|
| MIC <sub>50</sub>                                          | 16       | 1                    | 8           | 4                      |
| MIC <sub>90</sub>                                          | 64       | 8                    | 128         | 8                      |
| % Susceptible                                              | 16%      | 71.3%                | 62.6%       | 90%                    |
| % Intermediate                                             | 9.3%     | 12%                  | 9.3%        | 4.7%                   |
| % Resistant                                                | 74.7%    | 16.6%                | 28%         | 5.3%                   |
| <i>B. multivorans</i> ATCC 17616                           | 32       | 1                    | 1           | 1                      |
| <i>E. coli</i> DH10B pBC SK(+)                             | 0.5      | 0.5                  | 0.25        | 0.25                   |
| <i>E. coli</i> DH10B pBC SK(+) <i>bla</i> <sub>PenA1</sub> | 1        | 0.5                  | 8           | 0.25                   |
| <i>E. coli</i> DH10B pBC SK(+) <i>bla</i> <sub>AmpC1</sub> | 0.5      | 0.5                  | ND          | ND                     |
| <i>B. ambifaria</i> AU11161                                | 16       | 2                    | 128         | 16                     |
| <i>B. ambifaria</i> AU19862                                | 2        | 0.25                 | 2           | 2                      |
| <i>B. ambifaria</i> AU20319                                | 4        | 0.25                 | 64          | 16                     |
| <i>B. ambifaria</i> AU5203                                 | 4        | 0.5                  | 4           | 4                      |
| <i>B. arboris</i> AU24192                                  | 8        | 0.5                  | 4           | 2                      |
| <i>B. arboris</i> AU14372                                  | 32       | 4                    | 8           | 8                      |
| <i>B. cenocepacia</i> AU0133                               | 32       | 4                    | 4           | 4                      |
| <i>B. cenocepacia</i> AU0583                               | 16       | 0.5                  | 4           | 2                      |
| <i>B. cenocepacia</i> AU0756                               | 128      | 32                   | 128         | 32                     |
| <i>B. cenocepacia</i> AU10321                              | 32       | 8                    | 32          | 8                      |
| <i>B. cenocepacia</i> AU11339                              | 4        | 0.5                  | 4           | 2                      |
| <i>B. cenocepacia</i> AU12265                              | 16       | 2                    | 4           | 4                      |
| <i>B. cenocepacia</i> AU12571                              | 8        | 2                    | 2           | 2                      |

| Strains                       | Imipenem | Imipenem-relebactam* | Ceftazidime | Ceftazidime-avibactam* |
|-------------------------------|----------|----------------------|-------------|------------------------|
| <i>B. cenocepacia</i> AU12659 | 4        | 0.5                  | 8           | 4                      |
| <i>B. cenocepacia</i> AU13262 | 8        | 1                    | 16          | 4                      |
| <i>B. cenocepacia</i> AU14093 | 64       | 4                    | 128         | 8                      |
| <i>B. cenocepacia</i> AU14109 | 32       | 4                    | 32          | 8                      |
| <i>B. cenocepacia</i> AU14381 | 16       | 4                    | 8           | 4                      |
| <i>B. cenocepacia</i> AU16448 | 16       | 1                    | 4           | 4                      |
| <i>B. cenocepacia</i> AU17796 | 32       | 2                    | 4           | 2                      |
| <i>B. cenocepacia</i> AU19276 | 2        | 0.5                  | 8           | 4                      |
| <i>B. cenocepacia</i> AU19530 | 128      | 16                   | 16          | 8                      |
| <i>B. cenocepacia</i> AU19684 | 8        | 2                    | 32          | 16                     |
| <i>B. cenocepacia</i> AU20146 | 8        | 0.25                 | 4           | 2                      |
| <i>B. cenocepacia</i> AU20545 | 4        | 1                    | 4           | 2                      |
| <i>B. cenocepacia</i> AU20902 | 16       | 1                    | 4           | 2                      |
| <i>B. cenocepacia</i> AU20998 | 16       | 4                    | 128         | 8                      |
| <i>B. cenocepacia</i> AU21083 | 8        | 0.5                  | 4           | 2                      |
| <i>B. cenocepacia</i> AU22509 | 16       | 2                    | 4           | 2                      |
| <i>B. cenocepacia</i> AU24362 | 64       | 16                   | 4           | 8                      |
| <i>B. cenocepacia</i> AU28111 | 4        | 0.25                 | 4           | 2                      |
| <i>B. cenocepacia</i> AU29265 | 4        | 0.5                  | 4           | 2                      |
| <i>B. cenocepacia</i> AU3663  | 4        | 0.25                 | 16          | 8                      |
| <i>B. cenocepacia</i> AU6550  | 64       | 8                    | 4           | 4                      |
| <i>B. cenocepacia</i> AU8635  | 64       | 8                    | 16          | 4                      |
| <i>B. cenocepacia</i> AU9215  | 32       | 4                    | 64          | 8                      |
| <i>B. cenocepacia</i> AU9292  | 16       | 1                    | 4           | 2                      |
| <i>B. cenocepacia</i> AU9512  | 8        | 4                    | 16          | 8                      |
| <i>B. cenocepacia</i> AU9710  | 8        | 1                    | 4           | 4                      |
| <i>B. cepacia</i> AU0108      | 8        | 0.5                  | 8           | 2                      |
| <i>B. cepacia</i> AU0329      | 8        | 1                    | 8           | 4                      |

| Strains                       | Imipenem | Imipenem-relebactam* | Ceftazidime | Ceftazidime-avibactam* |
|-------------------------------|----------|----------------------|-------------|------------------------|
| <i>B. cepacia</i> AU11420     | 16       | 2                    | 16          | 4                      |
| <i>B. cepacia</i> AU13163     | 8        | 0.5                  | 8           | 4                      |
| <i>B. cepacia</i> AU13354     | 32       | 2                    | 64          | 4                      |
| <i>B. cepacia</i> AU15249     | 8        | 0.5                  | 8           | 4                      |
| <i>B. cepacia</i> AU1555      | 16       | 2                    | 8           | 4                      |
| <i>B. cepacia</i> AU15677     | 2        | 0.25                 | 8           | 4                      |
| <i>B. cepacia</i> AU16396     | 16       | 0.5                  | 8           | 4                      |
| <i>B. cepacia</i> AU17630     | 8        | 0.5                  | 32          | 8                      |
| <i>B. cepacia</i> AU19265     | 4        | 0.5                  | 8           | 4                      |
| <i>B. cepacia</i> AU22213     | 4        | 0.5                  | 8           | 4                      |
| <i>B. cepacia</i> AU23707     | 32       | 4                    | 8           | 4                      |
| <i>B. cepacia</i> AU27816     | 4        | 0.5                  | 4           | 4                      |
| <i>B. cepacia</i> AU29493     | 8        | 0.5                  | 16          | 4                      |
| <i>B. contaminans</i> AU15669 | 64       | 8                    | 16          | 8                      |
| <i>B. contaminans</i> AU17641 | 16       | 1                    | 8           | 2                      |
| <i>B. contaminans</i> AU20979 | 8        | 2                    | 128         | 32                     |
| <i>B. contaminans</i> AU21811 | 16       | 2                    | 64          | 8                      |
| <i>B. contaminans</i> AU22443 | 8        | 0.5                  | 4           | 2                      |
| <i>B. contaminans</i> AU22662 | 8        | 0.5                  | 4           | 2                      |
| <i>B. contaminans</i> AU25403 | 8        | 0.5                  | 4           | 2                      |
| <i>B. diffusa</i> AU19637     | 2        | 0.25                 | 16          | 8                      |
| <i>B. dolosa</i> AU12872      | 128      | 16                   | 128         | 16                     |
| <i>B. dolosa</i> AU29021      | 32       | 1                    | 32          | 8                      |
| <i>B. dolosa</i> AU29985      | 32       | 16                   | 512         | 64                     |
| <i>B. dolosa</i> AU9336       | 16       | 1                    | 8           | 4                      |
| <i>B. gladioli</i> AU0032     | 1        | 0.5                  | 8           | 16                     |
| <i>B. gladioli</i> AU1009     | 0.5      | 0.5                  | 8           | 8                      |
| <i>B. gladioli</i> AU16341    | 2        | 2                    | 64          | 64                     |

| Strains                       | Imipenem | Imipenem-relebactam* | Ceftazidime | Ceftazidime-avibactam* |
|-------------------------------|----------|----------------------|-------------|------------------------|
| <i>B. gladioli</i> AU21101    | 0.5      | 0.25                 | 8           | 4                      |
| <i>B. gladioli</i> AU26456    | 0.25     | 0.25                 | 16          | 16                     |
| <i>B. gladioli</i> AU27927    | 0.25     | 0.25                 | 8           | 4                      |
| <i>B. gladioli</i> AU28659    | 1        | 1                    | 16          | 8                      |
| <i>B. gladioli</i> AU29223    | 0.5      | 0.25                 | 8           | 4                      |
| <i>B. gladioli</i> AU29541    | 1        | 1                    | 64          | 64                     |
| <i>B. gladioli</i> AU30473    | 1        | 0.5                  | 32          | 32                     |
| <i>B. multivorans</i> AU10047 | 32       | 2                    | 8           | 4                      |
| <i>B. multivorans</i> AU10086 | 64       | 8                    | 8           | 4                      |
| <i>B. multivorans</i> AU10398 | 4        | 2                    | 512         | 8                      |
| <i>B. multivorans</i> AU10897 | 128      | 16                   | 4           | 2                      |
| <i>B. multivorans</i> AU11204 | 16       | 0.25                 | 2           | 2                      |
| <i>B. multivorans</i> AU11233 | 64       | 8                    | 32          | 4                      |
| <i>B. multivorans</i> AU11358 | 64       | 2                    | 2           | 2                      |
| <i>B. multivorans</i> AU11772 | 16       | 8                    | >512        | 8                      |
| <i>B. multivorans</i> AU12481 | 16       | 0.5                  | 4           | 2                      |
| <i>B. multivorans</i> AU13919 | 32       | 1                    | 2           | 2                      |
| <i>B. multivorans</i> AU14328 | 16       | 1                    | 2           | 2                      |
| <i>B. multivorans</i> AU14364 | 1        | 0.5                  | 256         | 2                      |
| <i>B. multivorans</i> AU14371 | 64       | 4                    | 2           | 2                      |
| <i>B. multivorans</i> AU14786 | 64       | 16                   | 32          | 4                      |
| <i>B. multivorans</i> AU15814 | 64       | 32                   | 256         | 8                      |
| <i>B. multivorans</i> AU15954 | 32       | 2                    | 2           | 2                      |
| <i>B. multivorans</i> AU16734 | 64       | 2                    | 2           | 2                      |
| <i>B. multivorans</i> AU17135 | 32       | 0.5                  | 2           | 2                      |
| <i>B. multivorans</i> AU17534 | 64       | 8                    | 64          | 8                      |
| <i>B. multivorans</i> AU17545 | 8        | 0.5                  | 8           | 4                      |
| <i>B. multivorans</i> AU18096 | 32       | 1                    | 2           | 2                      |

| Strains                       | Imipenem | Imipenem-relebactam* | Ceftazidime | Ceftazidime-avibactam* |
|-------------------------------|----------|----------------------|-------------|------------------------|
| <i>B. multivorans</i> AU19518 | 32       | 4                    | 4           | 4                      |
| <i>B. multivorans</i> AU19564 | 32       | 2                    | 2           | 1                      |
| <i>B. multivorans</i> AU19659 | 64       | 4                    | 32          | 8                      |
| <i>B. multivorans</i> AU19729 | 32       | 8                    | 8           | 8                      |
| <i>B. multivorans</i> AU20929 | 32       | 2                    | 2           | 2                      |
| <i>B. multivorans</i> AU21015 | 64       | 16                   | 128         | 4                      |
| <i>B. multivorans</i> AU21596 | 128      | 16                   | 64          | 4                      |
| <i>B. multivorans</i> AU22436 | 64       | 1                    | 2           | 2                      |
| <i>B. multivorans</i> AU22892 | 64       | 4                    | 2           | 2                      |
| <i>B. multivorans</i> AU23365 | 32       | 1                    | 32          | 4                      |
| <i>B. multivorans</i> AU23668 | 16       | 0.5                  | 1           | 1                      |
| <i>B. multivorans</i> AU23690 | 16       | 0.5                  | 4           | 2                      |
| <i>B. multivorans</i> AU23919 | 4        | 0.25                 | 512         | 2                      |
| <i>B. multivorans</i> AU23995 | 32       | 4                    | 8           | 2                      |
| <i>B. multivorans</i> AU24277 | 32       | 8                    | 64          | 8                      |
| <i>B. multivorans</i> AU25057 | 32       | 1                    | 8           | 8                      |
| <i>B. multivorans</i> AU25543 | 2        | 0.125                | 2           | 1                      |
| <i>B. multivorans</i> AU25626 | 32       | 8                    | 16          | 2                      |
| <i>B. multivorans</i> AU26250 | 32       | 2                    | 2           | 1                      |
| <i>B. multivorans</i> AU27706 | 0.25     | 0.125                | 2           | 2                      |
| <i>B. multivorans</i> AU28069 | 16       | 1                    | 2           | 2                      |
| <i>B. multivorans</i> AU28442 | 64       | 16                   | >128        | >128                   |
| <i>B. multivorans</i> AU29198 | 64       | 16                   | 16          | 4                      |
| <i>B. multivorans</i> AU30050 | 32       | 1                    | 1           | 1                      |
| <i>B. multivorans</i> AU30438 | 32       | 1                    | 4           | 2                      |
| <i>B. multivorans</i> AU30441 | 32       | 1                    | 2           | 2                      |
| <i>B. multivorans</i> AU30760 | 16       | 0.5                  | 2           | 2                      |
| <i>B. multivorans</i> AU4507  | 64       | 16                   | 2           | 2                      |

| Strains                             | Imipenem | Imipenem-relebactam* | Ceftazidime | Ceftazidime-avibactam* |
|-------------------------------------|----------|----------------------|-------------|------------------------|
| <i>B. pseudomultivorans</i> AU19682 | 8        | 2                    | 32          | 8                      |
| <i>B. pyrrocinia</i> AU1114         | 16       | 1                    | 8           | 2                      |
| <i>B. pyrrocinia</i> AU4348         | 32       | 2                    | 16          | 8                      |
| <i>B. seminalis</i> AU14842         | 4        | 1                    | 4           | 4                      |
| <i>B. stabilis</i> AU10235          | 16       | 2                    | 256         | 32                     |
| <i>B. stabilis</i> AU9035           | 16       | 4                    | 32          | 8                      |
| <i>B. ubonensis</i> AU7314          | 32       | 4                    | 512         | 8                      |
| <i>B. vietnamiensis</i> AU10214     | 0.25     | 0.125                | 8           | 2                      |
| <i>B. vietnamiensis</i> AU19457     | 16       | 1                    | 8           | 2                      |
| <i>B. vietnamiensis</i> AU21549     | 0.25     | 0.125                | 2           | 1                      |
| <i>B. vietnamiensis</i> AU26096     | 16       | 2                    | 8           | 8                      |
| <i>B. vietnamiensis</i> AU28056     | 0.5      | 0.5                  | 4           | 8                      |
| <i>B. vietnamiensis</i> AU28891     | 0.5      | 0.5                  | 4           | 4                      |
| <i>B. vietnamiensis</i> AU30387     | 0.125    | 0.125                | 1           | 0.5                    |
| <i>B. vietnamiensis</i> AU3578      | 0.5      | 0.5                  | 64          | 16                     |
| <i>B. vietnamiensis</i> AU3997      | 0.25     | 0.25                 | 2           | 1                      |
| <i>B. vietnamiensis</i> AU5003      | 32       | 2                    | 8           | 1                      |
| Bcc Indeterminate AU12560           | 8        | 1                    | 4           | 2                      |
| Bcc Indeterminate AU12848           | 16       | 2                    | 64          | 4                      |
| Bcc Indeterminate AU14915           | 64       | 8                    | 32          | 8                      |
| Bcc Indeterminate AU14962           | 16       | 0.5                  | 8           | 4                      |
| Bcc Indeterminate AU18117           | 16       | 4                    | 32          | 8                      |
| Bcc Indeterminate AU19076           | 8        | 0.5                  | 4           | 2                      |
| Bcc Indeterminate AU19821           | 64       | 4                    | 32          | 4                      |
| Bcc Indeterminate AU9162            | 8        | 1                    | 8           | 4                      |

Breakpoints for imipenem (susceptible (S)  $\leq 2\mu\text{g/mL}$ ; intermediate =  $4\mu\text{g/mL}$ ; resistant (R)  $\geq 8\mu\text{g/mL}$ ) for *P. aeruginosa* were used to assign phenotypes for imipenem and the combination with relebactam. Breakpoints for ceftazidime (susceptible (S)  $\leq 8\mu\text{g/mL}$ ; intermediate (I) =  $16\mu\text{g/mL}$ ; resistant (R)  $\geq 32\mu\text{g/mL}$ ) for Bcc were used to assign phenotypes to ceftazidime and the combination with avibactam. \*Relebactam and avibactam were tested at a fixed concentration of  $4\mu\text{g/mL}$ . ND, not determined.

**Supplementary Table 2.** Agar dilution susceptibility testing results grouped by species.

| Imipenem (µg/mL)                |          |          |           |           |           |           |           |           |           |           |           |          |          |          |            |           |            |
|---------------------------------|----------|----------|-----------|-----------|-----------|-----------|-----------|-----------|-----------|-----------|-----------|----------|----------|----------|------------|-----------|------------|
| Species                         | 0.06     | 0.125    | 0.25      | 0.5       | 1         | 2         | 4         | 8         | 16        | 32        | 64        | 128      | 256      | >256     | S          | I         | R          |
| <i>B. ambifaria</i> (4)         | 0        | 0        | 0         | 0         | 0         | 1         | 2         | 0         | 1         | 0         | 0         | 0        | 0        | 0        | 1          | 2         | 1          |
| <i>B. arboris</i> (2)           | 0        | 0        | 0         | 0         | 0         | 0         | 0         | 1         | 0         | 1         | 0         | 0        | 0        | 0        | 0          | 0         | 2          |
| <i>B. cenocepacia</i> (33)      | 0        | 0        | 0         | 0         | 0         | 1         | 6         | 7         | 8         | 5         | 4         | 2        | 0        | 0        | 1          | 6         | 26         |
| <i>B. cepacia</i> (15)          | 0        | 0        | 0         | 0         | 0         | 1         | 3         | 6         | 3         | 2         | 0         | 0        | 0        | 0        | 1          | 3         | 11         |
| <i>B. contaminans</i> (7)       | 0        | 0        | 0         | 0         | 0         | 0         | 0         | 4         | 2         | 0         | 1         | 0        | 0        | 0        | 0          | 0         | 7          |
| <i>B. diffusa</i> (1)           | 0        | 0        | 0         | 0         | 0         | 1         | 0         | 0         | 0         | 0         | 0         | 0        | 0        | 0        | 1          | 0         | 0          |
| <i>B. dolosa</i> (4)            | 0        | 0        | 0         | 0         | 0         | 0         | 0         | 0         | 1         | 2         | 0         | 1        | 0        | 0        | 0          | 0         | 4          |
| <i>B. gladioli</i> (10)         | 0        | 0        | 2         | 3         | 4         | 1         | 0         | 0         | 0         | 0         | 0         | 0        | 0        | 0        | 10         | 0         | 0          |
| <i>B. multivorans</i> (49)      | 0        | 0        | 1         | 0         | 1         | 1         | 2         | 1         | 8         | 18        | 15        | 2        | 0        | 0        | 3          | 2         | 44         |
| <i>B. pseudomultivorans</i> (1) | 0        | 0        | 0         | 0         | 0         | 0         | 0         | 1         | 0         | 0         | 0         | 0        | 0        | 0        | 0          | 0         | 1          |
| <i>B. pyrrocinia</i> (2)        | 0        | 0        | 0         | 0         | 0         | 0         | 0         | 0         | 1         | 1         | 0         | 0        | 0        | 0        | 0          | 0         | 2          |
| <i>B. seminalis</i> (1)         | 0        | 0        | 0         | 0         | 0         | 0         | 1         | 0         | 0         | 0         | 0         | 0        | 0        | 0        | 0          | 1         | 0          |
| <i>B. stabilis</i> (2)          | 0        | 0        | 0         | 0         | 0         | 0         | 0         | 0         | 2         | 0         | 0         | 0        | 0        | 0        | 0          | 0         | 2          |
| <i>B. ubonensis</i> (1)         | 0        | 0        | 0         | 0         | 0         | 0         | 0         | 0         | 0         | 1         | 0         | 0        | 0        | 0        | 0          | 0         | 1          |
| <i>B. vietnamiensis</i> (10)    | 0        | 1        | 3         | 3         | 0         | 0         | 0         | 0         | 2         | 1         | 0         | 0        | 0        | 0        | 7          | 0         | 3          |
| Bcc indeterminate (8)           | 0        | 0        | 0         | 0         | 0         | 0         | 0         | 3         | 3         | 0         | 2         | 0        | 0        | 0        | 0          | 0         | 8          |
| <b>Total (150)</b>              | <b>0</b> | <b>1</b> | <b>6</b>  | <b>6</b>  | <b>5</b>  | <b>6</b>  | <b>14</b> | <b>23</b> | <b>31</b> | <b>31</b> | <b>22</b> | <b>5</b> | <b>0</b> | <b>0</b> | <b>24</b>  | <b>14</b> | <b>112</b> |
| Imipenem-relebactam (µg/mL)     |          |          |           |           |           |           |           |           |           |           |           |          |          |          |            |           |            |
| Species                         | 0.06     | 0.125    | 0.25      | 0.5       | 1         | 2         | 4         | 8         | 16        | 32        | 64        | 128      | 256      | >256     | S          | I         | R          |
| <i>B. ambifaria</i> (4)         | 0        | 0        | 2         | 1         | 0         | 1         | 0         | 0         | 0         | 0         | 0         | 0        | 0        | 0        | 4          | 0         | 0          |
| <i>B. arboris</i> (2)           | 0        | 0        | 0         | 1         | 0         | 0         | 1         | 0         | 0         | 0         | 0         | 0        | 0        | 0        | 1          | 1         | 0          |
| <i>B. cenocepacia</i> (33)      | 0        | 0        | 3         | 6         | 6         | 5         | 7         | 3         | 2         | 1         | 0         | 0        | 0        | 0        | 20         | 7         | 6          |
| <i>B. cepacia</i> (15)          | 0        | 0        | 1         | 9         | 1         | 3         | 1         | 0         | 0         | 0         | 0         | 0        | 0        | 0        | 14         | 1         | 0          |
| <i>B. contaminans</i> (7)       | 0        | 0        | 0         | 3         | 1         | 2         | 0         | 1         | 0         | 0         | 0         | 0        | 0        | 0        | 6          | 0         | 1          |
| <i>B. diffusa</i> (1)           | 0        | 0        | 1         | 0         | 0         | 0         | 0         | 0         | 0         | 0         | 0         | 0        | 0        | 0        | 1          | 0         | 0          |
| <i>B. dolosa</i> (4)            | 0        | 0        | 0         | 0         | 2         | 0         | 0         | 0         | 2         | 0         | 0         | 0        | 0        | 0        | 2          | 0         | 2          |
| <i>B. gladioli</i> (10)         | 0        | 0        | 4         | 3         | 2         | 1         | 0         | 0         | 0         | 0         | 0         | 0        | 0        | 0        | 10         | 0         | 0          |
| <i>B. multivorans</i> (49)      | 0        | 2        | 2         | 7         | 10        | 8         | 5         | 7         | 7         | 1         | 0         | 0        | 0        | 0        | 29         | 5         | 15         |
| <i>B. pseudomultivorans</i> (1) | 0        | 0        | 0         | 0         | 0         | 1         | 0         | 0         | 0         | 0         | 0         | 0        | 0        | 0        | 1          | 0         | 0          |
| <i>B. pyrrocinia</i> (2)        | 0        | 0        | 0         | 0         | 1         | 1         | 0         | 0         | 0         | 0         | 0         | 0        | 0        | 0        | 2          | 0         | 0          |
| <i>B. seminalis</i> (1)         | 0        | 0        | 0         | 0         | 1         | 0         | 0         | 0         | 0         | 0         | 0         | 0        | 0        | 0        | 1          | 0         | 0          |
| <i>B. stabilis</i> (2)          | 0        | 0        | 0         | 0         | 0         | 1         | 1         | 0         | 0         | 0         | 0         | 0        | 0        | 0        | 1          | 1         | 0          |
| <i>B. ubonensis</i> (1)         | 0        | 0        | 0         | 0         | 0         | 0         | 1         | 0         | 0         | 0         | 0         | 0        | 0        | 0        | 0          | 1         | 0          |
| <i>B. vietnamiensis</i> (10)    | 0        | 3        | 1         | 3         | 1         | 2         | 0         | 0         | 0         | 0         | 0         | 0        | 0        | 0        | 10         | 0         | 0          |
| Bcc indeterminate (8)           | 0        | 0        | 0         | 2         | 2         | 1         | 2         | 1         | 0         | 0         | 0         | 0        | 0        | 0        | 5          | 2         | 1          |
| <b>Total (150)</b>              | <b>0</b> | <b>5</b> | <b>14</b> | <b>35</b> | <b>27</b> | <b>26</b> | <b>18</b> | <b>12</b> | <b>11</b> | <b>2</b>  | <b>0</b>  | <b>0</b> | <b>0</b> | <b>0</b> | <b>107</b> | <b>18</b> | <b>25</b>  |

Breakpoints for imipenem (susceptible (S)  $\leq 2 \mu\text{g/mL}$ ; intermediate =  $4 \mu\text{g/mL}$ ; resistant (R)  $\geq 8 \mu\text{g/mL}$ ) for *P. aeruginosa* were used to assign phenotypes for imipenem and the combination with relebactam.

\*Relebactam was tested at a fixed concentration of  $4 \mu\text{g/mL}$ .
